# Supplementary material for: Ventral Prostate Fibrosis in the Akita Mouse Is Associated with Macrophage and Fibrocyte Infiltration
Source: Hindawi journal article supplement (doi:10.1155/2014/939053), 2014-01-01
Supplement: f1 [file 939053.f1.pdf]

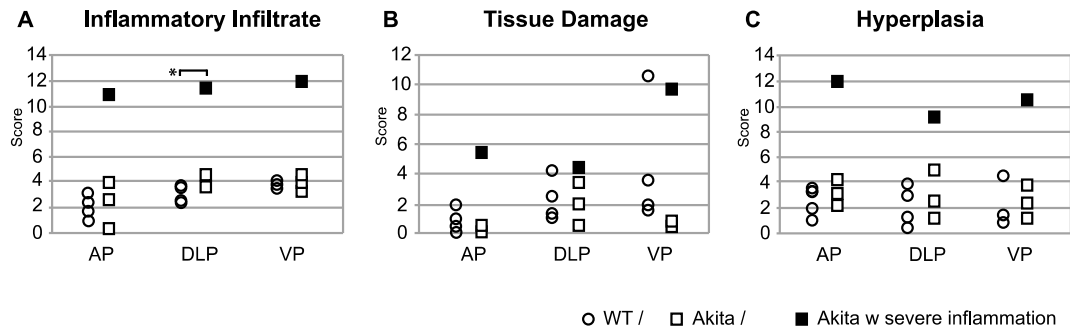

Supplementary Figure 1. Compartment of inflammatory infiltrate (A), tissue damage (B) and hyperplasia (C) between 18-week-old Akita and WT mice in each prostatic lobe; the AP, DLP and VP of 18-week-old DBA2J (WT, white circles), DBA2J.*Ins2*-Akita (diabetic, white squares) or DBA2J.*Ins2*-Akita with severe inflammation (diabetic, black squares). \*P-value < 0.05.
